# Supplementary material for: Multiprofessional intervention to improve adherence to medication in stroke patients: a study protocol for a randomised controlled trial (ADMED AVC study)
Source: PubMed Central journal article supplement — Eur J Hosp Pharm. 2020 Sep 25;29(3):169–75. doi: 10.1136/ejhpharm-2020-002425 (PMC9047932; doi:10.1136/ejhpharm-2020-002425), 2020-09-25
Supplement: ejhpharm-2020-002425supp001.pdf [file ejhpharm-2020-002425supp001.pdf]

## Liste des projets retenus au PREPS 2013

| FINESSE juridique | Nom de l'établissement de santé coordonnateur | Porteur de projet / Investigateur coordonnateur NOM | Porteur de projet / Investigateur coordonnateur PRENOM | Titre du projet                                                                                                                                                                                                                                                | N° du projet | Acronyme        | Montant accordé sous conditions de suivi (€) |
|-------------------|-----------------------------------------------|-----------------------------------------------------|--------------------------------------------------------|----------------------------------------------------------------------------------------------------------------------------------------------------------------------------------------------------------------------------------------------------------------|--------------|-----------------|----------------------------------------------|
| 750712184         | ASSISTANCE PUBLIQUE AP-HP                     | ALBERTI                                             | Corinne                                                | Expertise par les pairs des projets de recherche institutionnels : Élaboration de recommandations par consensus formalisé                                                                                                                                      | 13-0313      | EXPAIRS2        | 99 582                                       |
| 130786049         | APHM                                          | AUQUIER                                             | Pascal                                                 | Évaluation de l'adéquation entre l'état de santé des patients polyhandicapés et les structures de prise en charge : hospitalières versus médico-sociales                                                                                                       | 13-0105      | Trajectoire-PLH | 324 895                                      |
| 750712184         | ASSISTANCE PUBLIQUE AP-HP                     | BEAUSSIER                                           | Marc                                                   | Évaluation des modalités et de l'efficacité de la prise en charge des patients médicaux et chirurgicaux éligibles à l'admission en Unités de Surveillances Continues (USC)                                                                                     | 13-0610      | UNISURC         | 609 602                                      |
| 690781810         | HOSPICES CIVILS DE LYON                       | BONNEFOY                                            | Marc                                                   | Impact d'un programme de soins de transition hôpital - domicile sur la fréquence des ré-hospitalisations non programmées à 30 jours de malades âgés hospitalisés en court séjour gériatrique : essai multicentrique randomisé en cluster de type stepped wedge | 13-0367      | PROUST          | 435 868                                      |
| 130786049         | APHM                                          | BOYER                                               | Laurent                                                | Elaboration et stratégie d'implantation d'un questionnaire adaptatif de la qualité des soins perçue par les patients en psychiatrie                                                                                                                            | 13-0091      | QDS-Psy-CAT     | 282 420                                      |
| 940110018         | CENTRE HOSPITALIER INTERCOMMUNAL DE CRETEIL   | CAEYMAEX                                            | Laurence                                               | Etude épidémiologique sur les événements indésirables en réanimation néonatale. Évaluation de l'efficacité d'une intervention multi-facette sur la réduction du taux des événements indésirables                                                               | 13-0401      | SEPADVEN        | 542 554                                      |
| 760780239         | CHU ROUEN                                     | CARON                                               | François                                               | La carte Vitale permet-elle de prédire l'antibiorésistance ? Etude pilote en vue de guider les schémas antibiotiques probabilistes des infections urinaires communautaires                                                                                     | 13-0069      | Vitale          | 249 146                                      |
| 750712184         | ASSISTANCE PUBLIQUE AP-HP                     | CHEVREUIL                                           | Karine                                                 | Comparaison des Méthodes de Recueil des consommations de soins des patients inclus dans les projets de recherche clinique intégrant une évaluation médico-économique                                                                                           | 13-0071      | COMERE          | 95 000                                       |
| 590780193         | CHRU LILLE                                    | DERVAUX                                             | Benoit                                                 | Construire un jugement partagé sur la performance des hôpitaux universitaires : l'exemple du CHRU de Lille                                                                                                                                                     | 13-0209      | PERFHU          | 345 938                                      |
| 750712184         | ASSISTANCE PUBLIQUE AP-HP                     | FERNANDEZ                                           | Christine                                              | Développement de la conciliation médicamenteuse à l'aide du dossier pharmaceutique. Etude multicentrique nationale chez le sujet âgé hospitalisé en service de gériatrie, médecine interne et chirurgie orthopédique.                                          | 13-0303      | CONCIPAGE       | 551 162                                      |
| 440000289         | CHU DE NANTES                                 | GARRET                                              | Nicole                                                 | Évaluation clinique des pratiques intégratives en unités de soins infanto-juvéniles pour des enfants présentant un autisme typique ou atypique                                                                                                                 | 13-0205      | AUTISME         | 323 906                                      |
| 370000481         | CHRU DE TOURS                                 | GIRAudeau                                           | Bruno                                                  | Etude Méta-Epidémiologique : essais en Cluster vs essais à randomisation individuelle                                                                                                                                                                          | 13-0015      | MEpCluster      | 57 550                                       |
| 750712184         | ASSISTANCE PUBLIQUE AP-HP                     | GOTTOT                                              | Serge                                                  | Transition des soins pédiatriques vers les soins pour adultes chez les adolescents atteints de maladies chroniques                                                                                                                                             | 13-0298      | TRANSAD         | 77 711                                       |
| 690781810         | HOSPICES CIVILS DE LYON                       | KERIEL-GASCOU                                       | Maud                                                   | Etude PRisM : Pluriprofessionnalité et gestion des Risques par un programme Multifacette en soins primaires : mise en place et évaluation dans les centres, pôles et maisons de santé pluridisciplinaires                                                      | 13-0352      | PRisM           | 492 216                                      |
| 690781810         | HOSPICES CIVILS DE LYON                       | KROLAK-SALMON                                       | Pierre                                                 | OPTimisation thérapeutique médicamenteuse auprès d'une population âgée recue en consultation gériatrique et vivant à domicile                                                                                                                                  | 13-0531      | OPTIM           | 280 244                                      |
| 690781810         | HOSPICES CIVILS DE LYON                       | LIFANTE                                             | Jean-Christophe                                        | Impact d'un Suivi Prospectif de la Performance des Equipes Chirurgicales par Carte de Contrôle                                                                                                                                                                 | 13-0084      | SHEWHART        | 695 454                                      |
| 750712184         | ASSISTANCE PUBLIQUE AP-HP                     | MOURVILLIER                                         | Bruno                                                  | Enfant Visiteur En Réanimation Évaluation de l'intérêt pour l'enfant d'une visite encadrée de son parent hospitalisé en réanimation: étude prospective, randomisée, contrôlée, multicentrique                                                                  | 13-0167      | ENVERE          | 209 588                                      |
| 690781810         | HOSPICES CIVILS DE LYON                       | RODE                                                | Gilles                                                 | Impact d'une intervention pluriprofessionnelle visant à améliorer l'ADHésion Médicamenteuse (prévention secondaire cardio-neuro-vasculaire) chez les patients ayant présenté un Accident Vasculaire Cérébral Ischémique                                        | 13-0533      | ADMED-AVC       | 215 630                                      |
| 330781196         | CHU HOPITAUX DE BORDEAUX                      | SAILLOUR                                            | Florence                                               | Efficacité et conditions d'efficacité de la mise en place de combinaisons d'outils opérationnels de déploiement de la bientraitance en établissement de santé                                                                                                  | 13-0210      | MoS TRA         | 570 971                                      |
| 350005179         | CHU DE RENNES                                 | VEILLARD                                            | David                                                  | Prendre en compte le point de vue des aidants pour évaluer la qualité des soins aux patients atteints d'une pathologie chronique : un exemple appliqué à la Sclérose en Plaques (SEP)                                                                          | 13-0227      | AQUASEP         | 264 909                                      |
| 750712184         | ASSISTANCE PUBLIQUE AP-HP                     | YAZDANPANAH                                         | Yazdan                                                 | Coût-efficacité des interventions visant à contrôler la transmission des bactéries à Gram-négatif multi-résistantes à l'hôpital : une modélisation mathématique                                                                                                | 13-0693      | CEIBHOS         | 206 530                                      |

<https://solidarites-sante.gouv.fr/systeme-de-sante-et-medico-social/recherche-et-innovation/l-innovation-et-la-recherche-clinique/appels-a-projets/article/les-appels-a-projets-de-la-dgos-les-projets-retenus>
